# Supplementary material
Source: PubMed Central journal article supplement (PMC10860375)
Supplement: NIHMS1964800-supplement-Supplementary_table.pdf [file NIHMS1964800-supplement-Supplementary_table.pdf]

## Supplementary Data

SUPPLEMENTARY TABLE S1. MEAN ANNUAL INCIDENCE OF THE MOST COMMON *SALMONELLA* SEROTYPES, PERCENTAGE OF OUTBREAK-ASSOCIATED ILLNESSES THAT WERE FOODBORNE FOR EACH SEROTYPE, PERCENTAGE OF ALL CASES REPORTED TO LABORATORY-BASED ENTERIC DISEASE SURVEILLANCE SYSTEM, AND BOOTSTRAPPED FOODBORNE RELATEDNESS MEASURES, 1998–2015, UNITED STATES

| <i>Serotype</i>                            | <i>Incidence per 100,000 population<sup>a</sup> (ranked high to low)</i> | <i>Percentage of outbreak-associated illnesses that were foodborne<sup>b</sup></i> | <i>Percentage of confirmed cases reported to LEDSA<sup>a</sup></i> | <i>Bootstrapped FBR measure<sup>c</sup> (90% confidence interval)</i> |
|--------------------------------------------|--------------------------------------------------------------------------|------------------------------------------------------------------------------------|--------------------------------------------------------------------|-----------------------------------------------------------------------|
| 1 Enteritidis                              | 2.232                                                                    | 21.04                                                                              | 17.49                                                              | 1.22 (0.93–1.56)                                                      |
| 2 Typhimurium                              | 2.181                                                                    | 13.72                                                                              | 17.10                                                              | 0.77 (0.52–1.18)                                                      |
| 3 Newport                                  | 1.274                                                                    | 11.69                                                                              | 9.99                                                               | 1.16 (0.75–1.71)                                                      |
| 4 Javiana                                  | 0.626                                                                    | 4.17                                                                               | 4.91                                                               | 0.79 (0.36–1.58)                                                      |
| 5 Heidelberg                               | 0.510                                                                    | 6.55                                                                               | 4.00                                                               | 1.61 (0.93–2.58)                                                      |
| 6 I 4,[5],12:i:-                           | 0.359                                                                    | 3.39                                                                               | 2.81                                                               | 1.06 (0.28–2.71)                                                      |
| 7 Montevideo                               | 0.312                                                                    | 3.10                                                                               | 2.45                                                               | 1.14 (0.48–2.54)                                                      |
| 8 Muenchen                                 | 0.282                                                                    | 2.69                                                                               | 2.21                                                               | 0.86 (0.22–3.25)                                                      |
| 9 Saintpaul                                | 0.254                                                                    | 7.45                                                                               | 1.99                                                               | 2.14 (0.43–9.86)                                                      |
| 10 Infantis                                | 0.243                                                                    | 1.19                                                                               | 1.91                                                               | 0.61 (0.31–1.06)                                                      |
| 11 Oranienburg                             | 0.223                                                                    | 1.03                                                                               | 1.74                                                               | 0.56 (0.18–1.17)                                                      |
| 12 Braenderup                              | 0.204                                                                    | 1.86                                                                               | 1.60                                                               | 1.10 (0.51–2.16)                                                      |
| 13 Thompson                                | 0.179                                                                    | 0.81                                                                               | 1.41                                                               | 0.57 (0.28–0.99)                                                      |
| 14 Mississippi                             | 0.153                                                                    | 0.01                                                                               | 1.20                                                               | 0.01 (0.00–0.03)                                                      |
| 15 Agona                                   | 0.152                                                                    | 1.51                                                                               | 1.19                                                               | 1.08 (0.17–3.26)                                                      |
| 16 Paratyphi B variant L(+)<br>tartrate(+) | 0.133                                                                    | 0.23                                                                               | 1.04                                                               | 0.20 (0.02–0.53)                                                      |
| 17 Poona                                   | 0.107                                                                    | 3.57                                                                               | 0.84                                                               | 1.37 (0.12–14.59)                                                     |
| 18 Hadar                                   | 0.099                                                                    | 0.84                                                                               | 0.78                                                               | 1.01 (0.29–2.13)                                                      |
| 19 Bareilly                                | 0.099                                                                    | 0.11                                                                               | 0.78                                                               | 0.13 (0.02–0.32)                                                      |
| 20 Berta                                   | 0.087                                                                    | 1.22                                                                               | 0.68                                                               | 1.48 (0.43–4.34)                                                      |
| 21 Anatum                                  | 0.078                                                                    | 0.46                                                                               | 0.61                                                               | 0.71 (0.19–1.52)                                                      |
| 22 Schwarzengrund                          | 0.070                                                                    | 0.52                                                                               | 0.55                                                               | 0.82 (0.16–2.28)                                                      |
| 23 Stanley                                 | 0.069                                                                    | 0.33                                                                               | 0.54                                                               | 0.55 (0.09–1.40)                                                      |
| 24 Mbandaka                                | 0.064                                                                    | 0.52                                                                               | 0.51                                                               | 0.82 (0.13–2.78)                                                      |
| 25 Hartford                                | 0.064                                                                    | 0.44                                                                               | 0.50                                                               | 0.83 (0.22–1.75)                                                      |
| 26 Litchfield                              | 0.063                                                                    | 0.32                                                                               | 0.50                                                               | 0.46 (0.03–1.97)                                                      |
| 27 Panama                                  | 0.056                                                                    | 0.19                                                                               | 0.44                                                               | 0.39 (0.05–1.16)                                                      |
| 28 Sandiego                                | 0.050                                                                    | 0.03                                                                               | 0.40                                                               | 0.07 (0.02–0.22)                                                      |
| 29 Senftenberg                             | 0.047                                                                    | 0.31                                                                               | 0.37                                                               | 0.74 (0.13–2.15)                                                      |
| 30 Norwich                                 | 0.045                                                                    | 0.17                                                                               | 0.35                                                               | 0.44 (0.04–1.34)                                                      |
| 31 Derby                                   | 0.044                                                                    | 0.06                                                                               | 0.34                                                               | 0.16 (0.03–0.51)                                                      |
| 32 I 4,[5],12:b:-                          | 0.043                                                                    | 0.00                                                                               | 0.34                                                               | 0.00 (0.00–0.01)                                                      |
| 33 Rubislaw                                | 0.041                                                                    | 0.05                                                                               | 0.32                                                               | 0.20 (0.06–0.6)                                                       |
| 34 Rough                                   | 0.039                                                                    | 0.00                                                                               | 0.31                                                               | 0.00 (0.00–0.01)                                                      |
| 35 Give                                    | 0.036                                                                    | 0.05                                                                               | 0.28                                                               | 0.24 (0.02–0.77)                                                      |
| 36 Miami                                   | 0.033                                                                    | 0.37                                                                               | 0.26                                                               | 1.26 (0.33–3.09)                                                      |
| 37 Dublin                                  | 0.033                                                                    | 0.02                                                                               | 0.26                                                               | 0.09 (0.04–0.28)                                                      |
| 38 Tennessee                               | 0.031                                                                    | 2.33                                                                               | 0.25                                                               | 20.83 (10.18–57.58)                                                   |
| 39 I 13,23:b:-                             | 0.031                                                                    | 0.00                                                                               | 0.25                                                               | 0.00 (0.00–0.02)                                                      |
| 40 Brandenburg                             | 0.031                                                                    | 0.17                                                                               | 0.24                                                               | 0.62 (0.11–1.73)                                                      |
| 41 Virchow                                 | 0.027                                                                    | 0.39                                                                               | 0.21                                                               | 1.64 (0.25–4.43)                                                      |
| 42 Kentucky                                | 0.027                                                                    | 0.00                                                                               | 0.21                                                               | 0.00 (0.00–0.02)                                                      |
| 43 Adelaide                                | 0.027                                                                    | 0.08                                                                               | 0.21                                                               | 0.52 (0.23–1.36)                                                      |
| 44 Gaminara                                | 0.026                                                                    | 0.00                                                                               | 0.21                                                               | 0.00 (0.00–0.02)                                                      |
| 45 Manhattan                               | 0.026                                                                    | 0.02                                                                               | 0.20                                                               | 0.16 (0.10–0.44)                                                      |
| 46 Uganda                                  | 0.025                                                                    | 0.35                                                                               | 0.20                                                               | 1.67 (0.53–3.57)                                                      |
| 47 Weltevreden                             | 0.025                                                                    | 0.15                                                                               | 0.20                                                               | 0.68 (0.15–1.82)                                                      |
| 48 Bovismorbificans                        | 0.024                                                                    | 0.23                                                                               | 0.18                                                               | 1.11 (0.12–3.57)                                                      |
| 49 Reading                                 | 0.023                                                                    | 0.12                                                                               | 0.18                                                               | 0.65 (0.13–1.58)                                                      |

(continued)

SUPPLEMENTARY TABLE S1. (CONTINUED)

| <i>Serotype</i>   | <i>Incidence per 100,000 population<sup>a</sup> (ranked high to low)</i> | <i>Percentage of outbreak-associated illnesses that were foodborne<sup>b</sup></i> | <i>Percentage of confirmed cases reported to LEDSA</i> | <i>Bootstrapped FBR measure<sup>c</sup> (90% confidence interval)</i> |
|-------------------|--------------------------------------------------------------------------|------------------------------------------------------------------------------------|--------------------------------------------------------|-----------------------------------------------------------------------|
| 50 Muenster       | 0.023                                                                    | 0.19                                                                               | 0.18                                                   | 0.96 (0.12–2.54)                                                      |
| 51 Ohio           | 0.021                                                                    | 0.08                                                                               | 0.16                                                   | 0.47 (0.08–1.29)                                                      |
| 52 Blockley       | 0.020                                                                    | 0.04                                                                               | 0.16                                                   | 0.29 (0.11–0.75)                                                      |
| 53 Pomona         | 0.019                                                                    | 0.05                                                                               | 0.15                                                   | 0.37 (0.15–1.06)                                                      |
| 54 Kiambu         | 0.017                                                                    | 0.13                                                                               | 0.13                                                   | 0.96 (0.10–2.65)                                                      |
| 55 Hvittingfoss   | 0.017                                                                    | 0.35                                                                               | 0.13                                                   | 3.22 (0.17–11.06)                                                     |
| 56 Urbana         | 0.015                                                                    | 0.01                                                                               | 0.12                                                   | 0.15 (0.10–0.44)                                                      |
| 57 Inverness      | 0.015                                                                    | 0.00                                                                               | 0.11                                                   | 0.00 (0.00–0.03)                                                      |
| 58 Bredeney       | 0.013                                                                    | 0.14                                                                               | 0.11                                                   | 2.55 (1.56–7.02)                                                      |
| 59 London         | 0.013                                                                    | 0.04                                                                               | 0.10                                                   | 0.47 (0.13–1.35)                                                      |
| 60 Havana         | 0.012                                                                    | 0.01                                                                               | 0.10                                                   | 0.26 (0.17–0.73)                                                      |
| 61 Johannesburg   | 0.012                                                                    | 0.08                                                                               | 0.10                                                   | 0.98 (0.22–2.66)                                                      |
| 62 Chester        | 0.012                                                                    | 0.32                                                                               | 0.09                                                   | 3.43 (0.38–9.76)                                                      |
| 63 Cerro          | 0.011                                                                    | 0.00                                                                               | 0.09                                                   | 0.00 (0.00–0.04)                                                      |
| 64 Baildon        | 0.011                                                                    | 0.75                                                                               | 0.09                                                   | 7.83 (0.64–24.06)                                                     |
| 65 Worthington    | 0.010                                                                    | 0.00                                                                               | 0.08                                                   | 0.00 (0.00–0.04)                                                      |
| 66 I 6,7:-:1,5    | 0.010                                                                    | 0.00                                                                               | 0.07                                                   | 0.00 (0.00–0.05)                                                      |
| 67 Oslo           | 0.009                                                                    | 0.04                                                                               | 0.07                                                   | 0.93 (0.60–2.55)                                                      |
| 68 Albany         | 0.009                                                                    | 0.00                                                                               | 0.07                                                   | 0.00 (0.00–0.05)                                                      |
| 69 Minnesota      | 0.009                                                                    | 0.01                                                                               | 0.07                                                   | 0.35 (0.22–0.97)                                                      |
| 70 Agbeni         | 0.009                                                                    | 0.16                                                                               | 0.07                                                   | 4.43 (2.52–12.42)                                                     |
| 71 IV 50:z4,z23:- | 0.009                                                                    | 0.01                                                                               | 0.07                                                   | 0.19 (0.11–0.52)                                                      |
| 72 Telelkebir     | 0.009                                                                    | 0.00                                                                               | 0.07                                                   | 0.00 (0.00–0.05)                                                      |
| 73 IV 48:g,z51:-  | 0.008                                                                    | 0.00                                                                               | 0.06                                                   | 0.00 (0.00–0.06)                                                      |
| 74 Cubana         | 0.008                                                                    | 0.08                                                                               | 0.06                                                   | 0.95 (0.11–5.19)                                                      |
| 75 Rissen         | 0.008                                                                    | 0.28                                                                               | 0.06                                                   | 10.11 (5.22–27.33)                                                    |
| 76 Cotham         | 0.007                                                                    | 0.00                                                                               | 0.06                                                   | 0.00 (0.00–0.07)                                                      |
| 77 Lomalinda      | 0.007                                                                    | 0.01                                                                               | 0.05                                                   | 0.23 (0.15–0.65)                                                      |
| 78 I 9,12:l,z28:- | 0.007                                                                    | 0.00                                                                               | 0.05                                                   | 0.00 (0.00–0.07)                                                      |
| 79 Indiana        | 0.006                                                                    | 0.00                                                                               | 0.05                                                   | 0.00 (0.00–0.09)                                                      |
| 80 Ealing         | 0.006                                                                    | 0.00                                                                               | 0.05                                                   | 0.00 (0.00–0.07)                                                      |
| 81 Alachua        | 0.006                                                                    | 0.01                                                                               | 0.04                                                   | 0.29 (0.18–0.81)                                                      |
| 82 Monschau       | 0.006                                                                    | 0.00                                                                               | 0.04                                                   | 0.00 (0.00–0.08)                                                      |
| 83 Eastbourne     | 0.005                                                                    | 0.07                                                                               | 0.04                                                   | 3.41 (2.15–9.19)                                                      |
| 84 Carrau         | 0.005                                                                    | 0.17                                                                               | 0.04                                                   | 8.82 (4.96–25.12)                                                     |
| 85 Meleagridis    | 0.005                                                                    | 0.00                                                                               | 0.04                                                   | 0.00 (0.00–0.09)                                                      |
| 86 Potsdam        | 0.005                                                                    | 0.05                                                                               | 0.04                                                   | 1.69 (0.56–5.04)                                                      |
| 87 IV 50:g,z51:-  | 0.005                                                                    | 0.00                                                                               | 0.04                                                   | 0.00 (0.00–0.1)                                                       |
| 88 Corvallis      | 0.005                                                                    | 0.00                                                                               | 0.04                                                   | 0.00 (0.00–0.1)                                                       |
| 89 Kottbus        | 0.004                                                                    | 0.10                                                                               | 0.03                                                   | 6.77 (3.34–18.15)                                                     |

<sup>a</sup>Calculated from the LEDSA data.

<sup>b</sup>Calculated from the Foodborne Disease Outbreak Surveillance System data.

<sup>c</sup>Bootstrapped FBR measures cannot be directly calculated from the ratio of the crude percentages of outbreak-associated illnesses that were foodborne and confirmed cases reported to LEDSA.

FBR, foodborne relatedness; LEDSA, Laboratory-based Enteric Disease Surveillance.
